# Supplementary material
Source: PubMed Central journal article supplement (PMC4794047)
Supplement: horl020754.w1_default.pdf [file horl020754.w1_default.pdf]

Appendix A: Bivariate and multivariate associations of hospital volume with RSRR

| Cohort                 | Volume group | Unadjusted parameter estimate (95% CI) | p value | Adjusted parameter estimate (95% CI)* | p value |
|------------------------|--------------|----------------------------------------|---------|---------------------------------------|---------|
| All condition          | A            | -0.10 (-0.19, -0.01)                   | 0.038   | -0.24 (-0.38, -0.10)                  | <0.001  |
|                        | B            | -0.07 (-0.16, 0.02)                    | 0.12    | -0.25 (-0.37, -0.12)                  | <0.001  |
|                        | C            | -0.01 (-0.10, 0.08)                    | 0.85    | -0.21 (-0.32, -0.09)                  | <0.001  |
|                        | D            | 0.08 (-0.01, 0.17)                     | 0.09    | 0.03 (-0.07, 0.13)                    | 0.55    |
|                        | E            | REF                                    |         | REF                                   |         |
| Medicine               | A            | -0.17 (-0.30, -0.03)                   | 0.02    | -0.44 (-0.64, -0.25)                  | <0.001  |
|                        | B            | -0.14 (-0.28, -0.01)                   | 0.04    | -0.48 (-0.67, -0.30)                  | <0.001  |
|                        | C            | -0.05 (-0.19, 0.09)                    | 0.47    | -0.36 (-0.53, -0.20)                  | <0.001  |
|                        | D            | -0.06 (-0.20, 0.07)                    | 0.38    | -0.17 (-0.31, -0.03)                  | 0.01    |
|                        | E            | REF                                    |         | REF                                   |         |
| Surgery/<br>gynecology | A            | -0.01 (-0.12, 0.11)                    | 0.93    | 0.38 (0.23, 0.53)                     | <0.001  |
|                        | B            | 0.03 (-0.08, 0.15)                     | 0.54    | 0.36 (0.21, 0.50)                     | <0.001  |
|                        | C            | 0.04 (-0.07, 0.15)                     | 0.47    | 0.30 (0.17, 0.43)                     | <0.001  |
|                        | D            | 0.04 (-0.07, 0.16)                     | 0.44    | 0.23 (0.11, 0.34)                     | <0.001  |
|                        | E            | REF                                    |         | REF                                   |         |
| Cardiorespiratory      | A            | -0.38 (-0.54, -0.23)                   | <0.001  | -0.83 (-1.04, -0.62)                  | <0.001  |
|                        | B            | -0.30 (-0.46, -0.15)                   | <0.001  | -0.83 (-1.03, -0.63)                  | <0.001  |
|                        | C            | -0.04 (-0.20, 0.11)                    | 0.58    | -0.49 (-0.66, -0.31)                  | <0.001  |
|                        | D            | 0.06 (-0.09, 0.21)                     | 0.44    | -0.14 (-0.30, 0.02)                   | 0.08    |
|                        | E            | REF                                    |         | REF                                   |         |
| Cardiovascular         | A            | 0.14 (0.04, 0.23)                      | 0.004   | -0.07 (-0.20, 0.07)                   | 0.34    |
|                        | B            | 0.18 (0.08, 0.27)                      | <0.001  | 0.01 (-0.11, 0.13)                    | 0.85    |
|                        | C            | 0.15 (0.05, 0.24)                      | 0.002   | 0.05 (-0.05, 0.16)                    | 0.34    |
|                        | D            | 0.05 (-0.05, 0.14)                     | 0.28    | 0.03 (-0.06, 0.13)                    | 0.49    |
|                        | E            | REF                                    |         | REF                                   |         |
| Neurology              | A            | -0.20 (-0.29, -0.10)                   | <0.001  | -0.17 (-0.30, -0.05)                  | 0.006   |
|                        | B            | -0.16 (-0.26, -0.07)                   | <0.001  | -0.14 (-0.25, -0.03)                  | 0.02    |
|                        | C            | -0.19 (-0.28, -0.09)                   | <0.001  | -0.13 (-0.23, -0.03)                  | 0.01    |
|                        | D            | -0.17 (-0.26, -0.07)                   | <0.001  | -0.11 (-0.20, 0.01)                   | 0.02    |

| Cohort | Volume group | Unadjusted parameter estimate (95% CI) | p value | Adjusted parameter estimate (95% CI)* | p value |
|--------|--------------|----------------------------------------|---------|---------------------------------------|---------|
|        | E            | REF                                    |         | REF                                   |         |

\*Adjusted for safety net status, ownership, teaching status, cardiac procedure capability, urban/rural status, geographic region

Volume group A: 25 cases-20<sup>th</sup> percentile; B: 21<sup>st</sup> percentile-40<sup>th</sup> percentile; C: 41<sup>st</sup> percentile-60<sup>th</sup> percentile; D: 61<sup>st</sup> percentile-80<sup>th</sup> percentile; E: 81<sup>st</sup> percentile-100<sup>th</sup> percentile
