# Supplementary material
Source: PubMed Central journal article supplement (PMC4794047)
Supplement: horl020754.w2_default.pdf [file horl020754.w2_default.pdf]

## Appendix B

Table B1: Parameter estimates, all-condition

| Parameter                    |                                                     | Estimate | Standard Error | Wald 95% Confidence Limits |         | Pr > ChiSq |
|------------------------------|-----------------------------------------------------|----------|----------------|----------------------------|---------|------------|
| Intercept                    |                                                     | 16.277   | 0.3412         | 15.6083                    | 16.9457 | <.0001     |
| Volume quintile              | A: [25 - 173]                                       | -1.5565  | 0.241          | -2.0289                    | -1.084  | <.0001     |
|                              | B: (173 - 423]                                      | -0.7203  | 0.225          | -1.1613                    | -0.2793 | 0.0014     |
|                              | C: (423 - 1108]                                     | -0.5274  | 0.2037         | -0.9266                    | -0.1283 | 0.0096     |
|                              | D: (1108 - 2595]                                    | 0.0584   | 0.1686         | -0.2721                    | 0.3888  | 0.7292     |
|                              | E: (2595 - 25002]                                   | REF      |                |                            |         |            |
| Safety net status            | Safety net hospital                                 | 0.4894   | 0.1814         | 0.1338                     | 0.8449  | 0.007      |
|                              | Non-safety net hospital                             |          |                |                            |         |            |
| Ownership                    | Not for profit                                      | -0.1441  | 0.2063         | -0.5484                    | 0.2602  | 0.4848     |
|                              | Private                                             | 0.3964   | 0.2282         | -0.0508                    | 0.8437  | 0.0823     |
|                              | Public                                              | REF      |                |                            |         |            |
| Teaching status              | Member of Council of Teaching Hospitals             | 1.0726   | 0.2408         | 0.6005                     | 1.5446  | <.0001     |
|                              | Minor teaching hospital                             | -0.0323  | 0.1365         | -0.2998                    | 0.2353  | 0.8132     |
|                              | Non-teaching                                        | REF      |                |                            |         |            |
| Cardiac procedure capability | CABG                                                | -0.5367  | 0.1835         | -0.8964                    | -0.177  | 0.0035     |
|                              | Cardiac catheterization only, no CABG               | -0.3788  | 0.1656         | -0.7034                    | -0.0542 | 0.0222     |
|                              | Neither CABG nor cardiac catheterization capability | REF      |                |                            |         |            |
| Metropolitan classification  | Large Central Metro                                 | 0.2105   | 0.1943         | -0.1703                    | 0.5914  | 0.2785     |
|                              | Large Fringe Metro                                  | -0.0798  | 0.1846         | -0.4417                    | 0.2821  | 0.6655     |
|                              | Medium Metro                                        | -0.9333  | 0.1798         | -1.2857                    | -0.5809 | <.0001     |
|                              | Micropolitan                                        | -0.446   | 0.1589         | -0.7574                    | -0.1346 | 0.005      |
|                              | Small Metro                                         | -0.7149  | 0.1961         | -1.0993                    | -0.3306 | 0.0003     |
|                              | Noncore                                             | REF      |                |                            |         |            |
| Region                       | EN Central                                          | -0.2613  | 0.181          | -0.616                     | 0.0934  | 0.1487     |
|                              | ES Central                                          | 0.9926   | 0.2065         | 0.5879                     | 1.3973  | <.0001     |

|                    |                |         |        |         |         |        |
|--------------------|----------------|---------|--------|---------|---------|--------|
|                    | Mid-Atlantic   | 0.8434  | 0.2202 | 0.4119  | 1.2749  | 0.0001 |
|                    | Mountain       | -1.0282 | 0.2098 | -1.4394 | -0.6171 | <.0001 |
|                    | New England    | -0.0749 | 0.2817 | -0.627  | 0.4771  | 0.7902 |
|                    | Pacific        | -0.8269 | 0.197  | -1.2129 | -0.4408 | <.0001 |
|                    | South Atlantic | 0.179   | 0.1819 | -0.1776 | 0.5355  | 0.3253 |
|                    | WN Central     | -1.0951 | 0.1825 | -1.4528 | -0.7374 | <.0001 |
|                    | WS Central     | REF     |        |         |         |        |
| Quartile of RN/bed | Q1             | 0.605   | 0.1526 | 0.3058  | 0.9041  | <.0001 |
|                    | Q2             | 0.4964  | 0.1404 | 0.2213  | 0.7715  | 0.0004 |
|                    | Q3             | 0.1432  | 0.1367 | -0.1247 | 0.4111  | 0.2949 |
|                    | Q4             | REF     |        |         |         |        |
| Scale              |                | 3.1793  | 0.0335 | 3.1142  | 3.2456  |        |

Table B2: Parameter estimates, medicine cohort

| Parameter                    |                                                     | Estimate | Standard Error | Wald 95% Confidence Limits |         | Pr > ChiSq |
|------------------------------|-----------------------------------------------------|----------|----------------|----------------------------|---------|------------|
| Intercept                    |                                                     | 18.2959  | 0.4103         | 17.4917                    | 19.1001 | <.0001     |
| Volume quintile              | A: [25 - 99]                                        | -1.4082  | 0.2831         | -1.963                     | -0.8534 | <.0001     |
|                              | B: (99 - 218]                                       | -0.9882  | 0.2647         | -1.507                     | -0.4695 | 0.0002     |
|                              | C: (218 - 534]                                      | -0.6678  | 0.2346         | -1.1276                    | -0.208  | 0.0044     |
|                              | D: (534 - 1124]                                     | -0.2455  | 0.1989         | -0.6353                    | 0.1444  | 0.2171     |
|                              | E: (1124 - 11380]                                   | REF      |                |                            |         |            |
| Safety net status            | Safety net hospital                                 | 0.3782   | 0.2185         | -0.05                      | 0.8064  | 0.0834     |
|                              | Non-safety net hospital                             | REF      |                |                            |         |            |
| Ownership                    | Not for profit                                      | -0.2016  | 0.2492         | -0.6901                    | 0.2868  | 0.4185     |
|                              | Private                                             | 0.5728   | 0.278          | 0.0279                     | 1.1176  | 0.0394     |
|                              | Public                                              | REF      |                |                            |         |            |
| Teaching status              | Member of Council of Teaching Hospitals             | 1.0062   | 0.2889         | 0.4399                     | 1.5724  | 0.0005     |
|                              | Minor teaching hospital                             | 0.0794   | 0.1657         | -0.2453                    | 0.4042  | 0.6316     |
|                              | Non-teaching                                        |          |                |                            |         |            |
| Cardiac procedure capability | CABG                                                | -0.9724  | 0.2123         | -1.3885                    | -0.5563 | <.0001     |
|                              | Cardiac catheterization only, no CABG               | -0.5088  | 0.1966         | -0.8942                    | -0.1233 | 0.0097     |
|                              | Neither CABG nor cardiac catheterization capability | REF      |                |                            |         |            |

|                             |                     |         |        |         |         |        |
|-----------------------------|---------------------|---------|--------|---------|---------|--------|
| Metropolitan classification | Large Central Metro | 0.3932  | 0.2421 | -0.0813 | 0.8677  | 0.1044 |
|                             | Large Fringe Metro  | -0.2083 | 0.2262 | -0.6517 | 0.2351  | 0.3572 |
|                             | Medium Metro        | -1.0155 | 0.2219 | -1.4503 | -0.5806 | <.0001 |
|                             | Micropolitan        | -0.5313 | 0.194  | -0.9116 | -0.151  | 0.0062 |
|                             | Small Metro         | -0.5995 | 0.242  | -1.0739 | -0.1252 | 0.0132 |
|                             | Noncore             | REF     |        |         |         |        |
| Region                      | EN Central          | -0.2883 | 0.2224 | -0.7242 | 0.1475  | 0.1948 |
|                             | ES Central          | 0.7131  | 0.2522 | 0.2188  | 1.2074  | 0.0047 |
|                             | Mid-Atlantic        | 0.7741  | 0.2685 | 0.2479  | 1.3003  | 0.0039 |
|                             | Mountain            | -1.0829 | 0.2644 | -1.6011 | -0.5647 | <.0001 |
|                             | New England         | -0.2121 | 0.3398 | -0.878  | 0.4539  | 0.5325 |
|                             | Pacific             | -0.8093 | 0.2457 | -1.291  | -0.3277 | 0.001  |
|                             | South Atlantic      | -0.0989 | 0.2238 | -0.5376 | 0.3397  | 0.6585 |
|                             | WN Central          | -0.9653 | 0.228  | -1.4122 | -0.5184 | <.0001 |
|                             | WS Central          | REF     |        |         |         |        |
| Quartile of RN/bed          | Q1                  | 0.4989  | 0.1889 | 0.1286  | 0.8691  | 0.0083 |
|                             | Q2                  | 0.3674  | 0.1732 | 0.0279  | 0.7068  | 0.0339 |
|                             | Q3                  | -0.0512 | 0.1675 | -0.3795 | 0.2771  | 0.7597 |
|                             | Q4                  | REF     |        |         |         |        |
| Scale                       |                     | 3.8034  | 0.0411 | 3.7237  | 3.8847  |        |

Table B3: Parameter estimates, surgery/gynecology cohort

| Parameter         |                         | Estimate | Standard Error | Wald 95% Confidence Limits |         | Pr > ChiSq |
|-------------------|-------------------------|----------|----------------|----------------------------|---------|------------|
| Intercept         |                         | 10.1785  | 0.4463         | 9.3037                     | 11.0533 | <.0001     |
| Volume quintile   | A: [25 - 79]            | 0.6313   | 0.2733         | 0.0957                     | 1.1669  | 0.0209     |
|                   | B: (79 - 186]           | 0.6584   | 0.2555         | 0.1577                     | 1.1591  | 0.01       |
|                   | C: (186 - 389]          | 0.4912   | 0.2304         | 0.0398                     | 0.9427  | 0.033      |
|                   | D: (389 - 792]          | 0.3559   | 0.2038         | -0.0434                    | 0.7553  | 0.0807     |
|                   | E: (792 - 6389]         | REF      |                |                            |         |            |
| Safety net status | Safety net hospital     | 0.2533   | 0.2092         | -0.1568                    | 0.6634  | 0.226      |
|                   | Non-safety net hospital | REF      |                |                            |         |            |

|                              |                                                     |         |        |         |         |        |
|------------------------------|-----------------------------------------------------|---------|--------|---------|---------|--------|
| Ownership                    | Not for profit                                      | 0.0311  | 0.2553 | -0.4692 | 0.5314  | 0.903  |
|                              | Private                                             | 0.7686  | 0.2825 | 0.215   | 1.3222  | 0.0065 |
|                              | Public                                              | REF     |        |         |         |        |
| Teaching status              | Member of Council of Teaching Hospitals             | 1.3138  | 0.2633 | 0.7976  | 1.8299  | <.0001 |
|                              | Minor teaching hospital                             | 0.0129  | 0.1559 | -0.2926 | 0.3185  | 0.9339 |
|                              | Non-teaching                                        |         |        |         |         |        |
| Cardiac procedure capability | CABG                                                | 0.5731  | 0.1984 | 0.1843  | 0.9619  | 0.0039 |
|                              | Cardiac catheterization only, no CABG               | 0.2101  | 0.1776 | -0.138  | 0.5581  | 0.2368 |
|                              | Neither CABG nor cardiac catheterization capability | REF     |        |         |         |        |
| Metropolitan classification  | Large Central Metro                                 | 0.5078  | 0.2752 | -0.0316 | 1.0472  | 0.065  |
|                              | Large Fringe Metro                                  | 0.5573  | 0.2687 | 0.0305  | 1.084   | 0.0381 |
|                              | Medium Metro                                        | -0.4189 | 0.2699 | -0.948  | 0.1101  | 0.1207 |
|                              | Micropolitan                                        | -0.2311 | 0.2487 | -0.7185 | 0.2563  | 0.3527 |
|                              | Small Metro                                         | -0.2174 | 0.292  | -0.7897 | 0.3548  | 0.4564 |
|                              | Noncore                                             | REF     |        |         |         |        |
| Region                       | EN Central                                          | 0.1069  | 0.2319 | -0.3476 | 0.5615  | 0.6448 |
|                              | ES Central                                          | 0.984   | 0.2878 | 0.4198  | 1.5481  | 0.0006 |
|                              | Mid-Atlantic                                        | 0.9848  | 0.2654 | 0.4646  | 1.5049  | 0.0002 |
|                              | Mountain                                            | -0.3602 | 0.2785 | -0.906  | 0.1855  | 0.1958 |
|                              | New England                                         | 0.2692  | 0.3317 | -0.3808 | 0.9193  | 0.4169 |
|                              | Pacific                                             | -0.7017 | 0.2481 | -1.1879 | -0.2155 | 0.0047 |
|                              | South Atlantic                                      | 0.6828  | 0.2315 | 0.229   | 1.1366  | 0.0032 |
|                              | WN Central                                          | -0.4322 | 0.267  | -0.9554 | 0.0911  | 0.1055 |
|                              | WS Central                                          | REF     |        |         |         |        |
| Quartile of RN/bed           | Q1                                                  | 0.118   | 0.2132 | -0.2999 | 0.5359  | 0.58   |
|                              | Q2                                                  | 0.301   | 0.1674 | -0.027  | 0.629   | 0.0721 |
|                              | Q3                                                  | -0.0143 | 0.1551 | -0.3183 | 0.2897  | 0.9265 |
|                              | Q4                                                  | REF     |        |         |         |        |
| Scale                        |                                                     | 3.3519  | 0.0421 | 3.2703  | 3.4354  |        |

Table B4: Parameter estimates, cardiorespiratory cohort

| Parameter                    |                                                     | Estimate | Standard Error | Wald 95% Confidence Limits |         | Pr > ChiSq |
|------------------------------|-----------------------------------------------------|----------|----------------|----------------------------|---------|------------|
| Intercept                    |                                                     | 21.3644  | 0.5038         | 20.377                     | 22.3518 | <.0001     |
| Volume quintile              | A: [25 - 68]                                        | -3.0107  | 0.3402         | -3.6774                    | -2.344  | <.0001     |
|                              | B: (68 - 133]                                       | -1.8091  | 0.31           | -2.4167                    | -1.2015 | <.0001     |
|                              | C: (133 - 252]                                      | -0.8416  | 0.2797         | -1.3898                    | -0.2935 | 0.0026     |
|                              | D: (252 - 458]                                      | -0.2066  | 0.2461         | -0.6889                    | 0.2757  | 0.4012     |
|                              | E: (458 - 3068]                                     | REF      |                |                            |         |            |
| Safety net status            | Safety net hospital                                 | 0.4082   | 0.2733         | -0.1276                    | 0.9439  | 0.1354     |
|                              | Non-safety net hospital                             | REF      |                |                            |         |            |
| Ownership                    | Not for profit                                      | 0.0485   | 0.3143         | -0.5675                    | 0.6646  | 0.8773     |
|                              | Private                                             | 0.7783   | 0.3493         | 0.0937                     | 1.4628  | 0.0259     |
|                              | Public                                              | REF      |                |                            |         |            |
| Teaching status              | Member of Council of Teaching Hospitals             | 0.8352   | 0.359          | 0.1316                     | 1.5389  | 0.02       |
|                              | Minor teaching hospital                             | 0.0305   | 0.209          | -0.3792                    | 0.4402  | 0.884      |
|                              | Non-teaching                                        | REF      |                |                            |         |            |
| Cardiac procedure capability | CABG                                                | -1.408   | 0.2618         | -1.9212                    | -0.8949 | <.0001     |
|                              | Cardiac catheterization only, no CABG               | -0.6917  | 0.2419         | -1.1658                    | -0.2175 | 0.0042     |
|                              | Neither CABG nor cardiac catheterization capability | REF      |                |                            |         |            |
| Metropolitan classification  | Large Central Metro                                 | 0.7548   | 0.303          | 0.1609                     | 1.3487  | 0.0127     |
|                              | Large Fringe Metro                                  | 0.0494   | 0.2842         | -0.5075                    | 0.6064  | 0.8619     |
|                              | Medium Metro                                        | -0.4935  | 0.2801         | -1.0425                    | 0.0555  | 0.0781     |
|                              | Micropolitan                                        | -0.4541  | 0.246          | -0.9361                    | 0.028   | 0.0649     |
|                              | Small Metro                                         | -0.7935  | 0.3069         | -1.3951                    | -0.192  | 0.0097     |
|                              | Noncore                                             | REF      |                |                            |         |            |
| Region                       | EN Central                                          | -0.5556  | 0.2804         | -1.1052                    | -0.0061 | 0.0475     |
|                              | ES Central                                          | 0.9087   | 0.3175         | 0.2865                     | 1.5309  | 0.0042     |

|                    |                |         |        |         |         |        |
|--------------------|----------------|---------|--------|---------|---------|--------|
|                    | Mid-Atlantic   | 0.7953  | 0.337  | 0.1348  | 1.4559  | 0.0183 |
|                    | Mountain       | -1.7279 | 0.3475 | -2.4089 | -1.0469 | <.0001 |
|                    | New England    | -0.2552 | 0.4276 | -1.0933 | 0.5829  | 0.5507 |
|                    | Pacific        | -0.9519 | 0.315  | -1.5692 | -0.3346 | 0.0025 |
|                    | South Atlantic | -0.0259 | 0.2814 | -0.5774 | 0.5256  | 0.9268 |
|                    | WN Central     | -0.9407 | 0.2928 | -1.5145 | -0.3668 | 0.0013 |
|                    | WS Central     | REF     |        |         |         |        |
| Quartile of RN/bed | Q1             | 0.8793  | 0.2427 | 0.4036  | 1.355   | 0.0003 |
|                    | Q2             | 0.3432  | 0.2188 | -0.0857 | 0.7721  | 0.1168 |
|                    | Q3             | 0.097   | 0.2109 | -0.3164 | 0.5103  | 0.6456 |
|                    | Q4             | REF     |        |         |         |        |
| Scale              |                | 4.707   | 0.0522 | 4.6058  | 4.8105  |        |

Table B5: Parameter estimates, cardiovascular cohort standardized readmission rate

| Parameter                    |                                                     | Estimate | Standard Error | Wald 95% Confidence Limits |         | Pr > ChiSq |
|------------------------------|-----------------------------------------------------|----------|----------------|----------------------------|---------|------------|
| Intercept                    |                                                     | 16.3191  | 0.5472         | 15.2466                    | 17.3915 | <.0001     |
| Volume quintile              | A: [25 - 50]                                        | -0.572   | 0.327          | -1.2129                    | 0.0689  | 0.0802     |
|                              | B: (50 - 120]                                       | -0.1282  | 0.2904         | -0.6973                    | 0.4409  | 0.6588     |
|                              | C: (120 - 237]                                      | 0.0251   | 0.2609         | -0.4862                    | 0.5365  | 0.9233     |
|                              | D: (237 - 441]                                      | -0.053   | 0.2353         | -0.5142                    | 0.4082  | 0.8219     |
|                              | E: (441 - 3361]                                     | REF      |                |                            |         |            |
| Safety net status            | Safety net hospital                                 | 0.6102   | 0.2478         | 0.1245                     | 1.0959  | 0.0138     |
|                              | Non-safety net hospital                             | REF      |                |                            |         |            |
| Ownership                    | Not for profit                                      | 0.0326   | 0.3067         | -0.5686                    | 0.6338  | 0.9153     |
|                              | Private                                             | 0.8493   | 0.3341         | 0.1944                     | 1.5041  | 0.011      |
|                              | Public                                              | REF      |                |                            |         |            |
| Teaching status              | Member of Council of Teaching Hospitals             | 0.7418   | 0.3027         | 0.1486                     | 1.335   | 0.0143     |
|                              | Minor teaching hospital                             | -0.0557  | 0.1859         | -0.4201                    | 0.3087  | 0.7645     |
|                              | Non-teaching                                        | REF      |                |                            |         |            |
| Cardiac procedure capability | CABG                                                | -0.6686  | 0.243          | -1.1449                    | -0.1924 | 0.0059     |
|                              | Cardiac catheterization only, no CABG               | -0.2294  | 0.2131         | -0.6472                    | 0.1883  | 0.2817     |
|                              | Neither CABG nor cardiac catheterization capability | REF      |                |                            |         |            |

|                             |                     |         |        |         |         |        |
|-----------------------------|---------------------|---------|--------|---------|---------|--------|
| Metropolitan classification | Large Central Metro | -1.6363 | 0.334  | -2.2908 | -0.9817 | <.0001 |
|                             | Large Fringe Metro  | -2.0044 | 0.3255 | -2.6424 | -1.3664 | <.0001 |
|                             | Medium Metro        | -2.5485 | 0.3276 | -3.1905 | -1.9064 | <.0001 |
|                             | Micropolitan        | -1.9699 | 0.3026 | -2.5629 | -1.3768 | <.0001 |
|                             | Small Metro         | -2.1811 | 0.3548 | -2.8765 | -1.4856 | <.0001 |
|                             | Noncore             | REF     |        |         |         |        |
| Region                      | EN Central          | -0.3787 | 0.2764 | -0.9204 | 0.163   | 0.1707 |
|                             | ES Central          | 0.3637  | 0.324  | -0.2713 | 0.9987  | 0.2616 |
|                             | Mid-Atlantic        | 0.4416  | 0.3105 | -0.167  | 1.0501  | 0.155  |
|                             | Mountain            | -1.7343 | 0.3576 | -2.4352 | -1.0334 | <.0001 |
|                             | New Enlgand         | -0.1663 | 0.3832 | -0.9174 | 0.5848  | 0.6643 |
|                             | Pacific             | -1.3452 | 0.3009 | -1.935  | -0.7554 | <.0001 |
|                             | South Atlantic      | -0.4617 | 0.2732 | -0.9972 | 0.0738  | 0.091  |
|                             | WN Central          | -0.5187 | 0.3325 | -1.1703 | 0.1329  | 0.1187 |
|                             | WS Central          | REF     |        |         |         |        |
| Quartile of RN/bed          | Q1                  | 0.4602  | 0.259  | -0.0475 | 0.968   | 0.0756 |
|                             | Q2                  | 0.1415  | 0.2044 | -0.259  | 0.542   | 0.4886 |
|                             | Q3                  | -0.1389 | 0.1894 | -0.5101 | 0.2324  | 0.4634 |
|                             | Q4                  | REF     |        |         |         |        |
| Scale                       |                     | 3.813   | 0.0503 | 3.7156  | 3.9129  |        |

Table B6: Parameter estimates, neurology cohort standardized readmission rates

| Parameter         |                     | Estimate | Standard Error | Wald 95% Confidence Limits |         | Pr > ChiSq |
|-------------------|---------------------|----------|----------------|----------------------------|---------|------------|
| Intercept         |                     | 13.0444  | 0.6736         | 11.7243                    | 14.3646 | <.0001     |
| Volume quintile   | A: [25 - 44]        | -0.8749  | 0.3642         | -1.5888                    | -0.1611 | 0.0163     |
|                   | B: (44 - 84]        | -0.348   | 0.3264         | -0.9877                    | 0.2917  | 0.2863     |
|                   | C: (84 - 141]       | -0.2329  | 0.2997         | -0.8202                    | 0.3545  | 0.4372     |
|                   | D: (141 - 249]      | -0.1539  | 0.2772         | -0.6972                    | 0.3895  | 0.5789     |
|                   | E: (249 - 1429]     | REF      |                |                            |         |            |
| Safety net status | Safety net hospital | 0.8651   | 0.2931         | 0.2906                     | 1.4396  | 0.0032     |

|                              |                                                     |         |        |         |         |        |
|------------------------------|-----------------------------------------------------|---------|--------|---------|---------|--------|
|                              | Non-safety net hospital                             | REF     |        |         |         |        |
| Ownership                    | Not for profit                                      | 0.8706  | 0.3676 | 0.15    | 1.5911  | 0.0179 |
|                              | Private                                             | 1.471   | 0.4019 | 0.6833  | 2.2586  | 0.0003 |
|                              | Public                                              | REF     |        |         |         |        |
| Teaching status              | Member of Council of Teaching Hospitals             | 1.0234  | 0.3508 | 0.3358  | 1.7109  | 0.0035 |
|                              | Minor teaching hospital                             | 0.1143  | 0.2146 | -0.3064 | 0.5349  | 0.5944 |
|                              | Non-teaching                                        | REF     |        |         |         |        |
| Cardiac procedure capability | CABG                                                | -0.8069 | 0.2661 | -1.3284 | -0.2855 | 0.0024 |
|                              | Cardiac catheterization only, no CABG               | -0.9355 | 0.2447 | -1.4152 | -0.4558 | 0.0001 |
|                              | Neither CABG nor cardiac catheterization capability | REF     |        |         |         |        |
| Metropolitan classification  | Large Central Metro                                 | 1.1667  | 0.446  | 0.2925  | 2.0409  | 0.0089 |
|                              | Large Fringe Metro                                  | 0.3439  | 0.4366 | -0.5117 | 1.1996  | 0.4308 |
|                              | Medium Metro                                        | -0.2538 | 0.4369 | -1.11   | 0.6025  | 0.5613 |
|                              | Micropolitan                                        | -0.4934 | 0.4141 | -1.3051 | 0.3182  | 0.2334 |
|                              | Small Metro                                         | -0.4214 | 0.4639 | -1.3306 | 0.4877  | 0.3636 |
|                              | Noncore                                             | REF     |        |         |         |        |
| Region                       | EN Central                                          | -1.0591 | 0.3381 | -1.7217 | -0.3964 | 0.0017 |
|                              | ES Central                                          | 1.2949  | 0.3946 | 0.5215  | 2.0683  | 0.001  |
|                              | Mid-Atlantic                                        | 0.3811  | 0.3756 | -0.3551 | 1.1173  | 0.3103 |
|                              | Mountain                                            | -1.4103 | 0.4422 | -2.2771 | -0.5435 | 0.0014 |
|                              | New Enlgand                                         | -0.5033 | 0.4616 | -1.4081 | 0.4015  | 0.2756 |
|                              | Pacific                                             | -0.6469 | 0.3607 | -1.3538 | 0.06    | 0.0729 |
|                              | South Atlantic                                      | 0.3558  | 0.3296 | -0.2901 | 1.0017  | 0.2803 |
|                              | WN Central                                          | -0.8194 | 0.411  | -1.6249 | -0.0139 | 0.0462 |
|                              | WS Central                                          | REF     |        |         |         |        |
| Quartile of RN/bed           | Q1                                                  | 0.3941  | 0.3226 | -0.2381 | 1.0264  | 0.2218 |
|                              | Q2                                                  | 0.4326  | 0.2448 | -0.0471 | 0.9124  | 0.0771 |
|                              | Q3                                                  | 0.252   | 0.2223 | -0.1837 | 0.6878  | 0.2569 |
|                              | Q4                                                  | REF     |        |         |         |        |
| Scale                        |                                                     | 4.2651  | 0.0599 | 4.1492  | 4.3842  |        |
